# Supplementary material for: Molecular and polymeric zinc(ii) phosphonates: isolation of an octanuclear ellipsoidal ensemble
Source: Royal Society of Chemistry journal article supplement (doi:10.1039/c3dt53614a), 2014-01-01
Supplement: c3dt53614a1.pdf [file c3dt53614a1.pdf]

*Electronic Supplementary Information (ESI)*

***Molecular and Polymeric Zinc(II) Phosphonates:  
Isolation of an Octanuclear Ellipsoidal Ensemble***

Dipankar Sahoo<sup>a</sup>, Ramakirushnan Suriyanarayanan<sup>a</sup>, Ramesh K. Metre<sup>a</sup> and Vadapalli  
Chandrasekhar<sup>\*a,b</sup>

<sup>a</sup> Department of Chemistry, Indian Institute of Technology Kanpur, Kanpur - 208016, India.

<sup>b</sup> National Institute of Science Education and Research, Institute of Physics Campus, Sachivalaya Marg, Sainik  
School Road, Bhubaneswar-751 005, Orissa, India

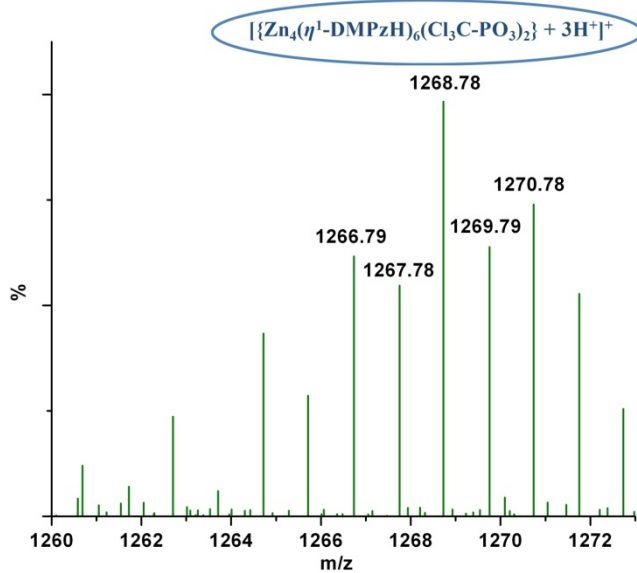

**Figure S1.** ESI-MS of 2.

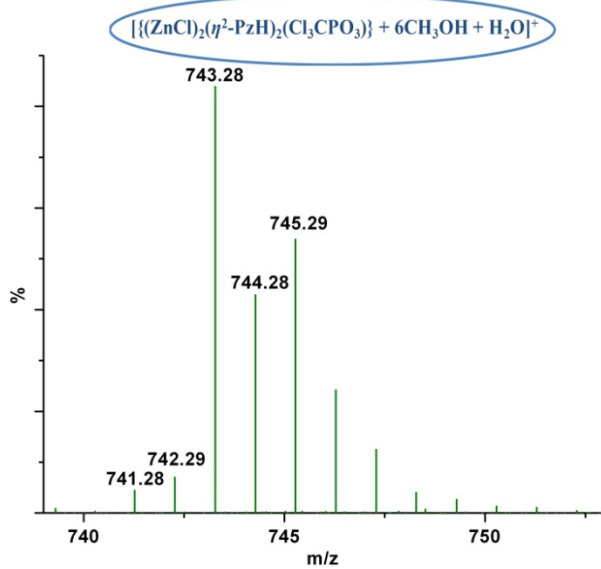

**Figure S2.** ESI-MS of 3.

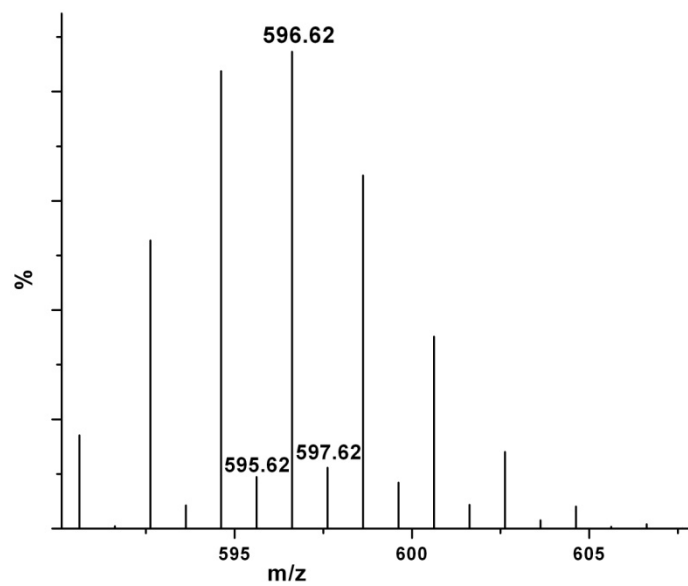

**Figure S3.** Simulated ESI-MS of **1**.

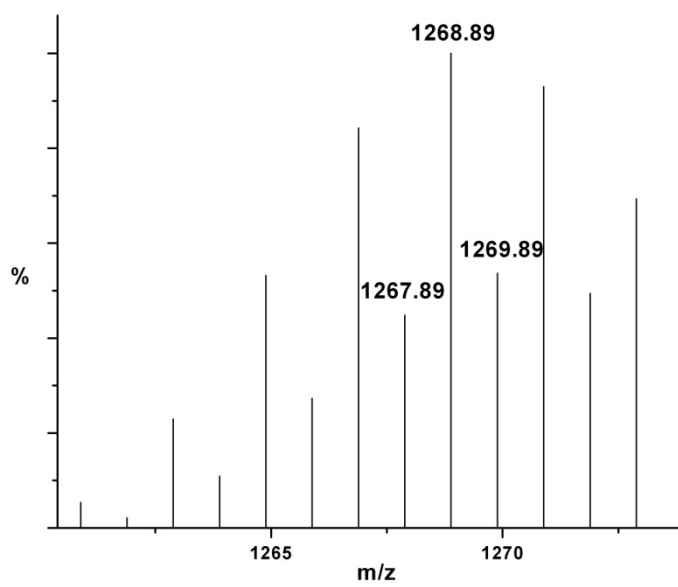

**Figure S4.** Simulated ESI-MS of **2**.

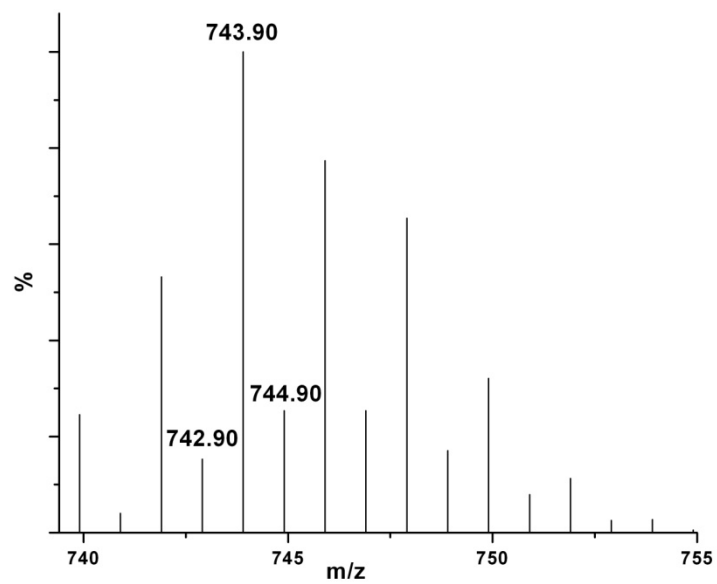

**Figure S5.** Simulated ESI-MS of **3**.

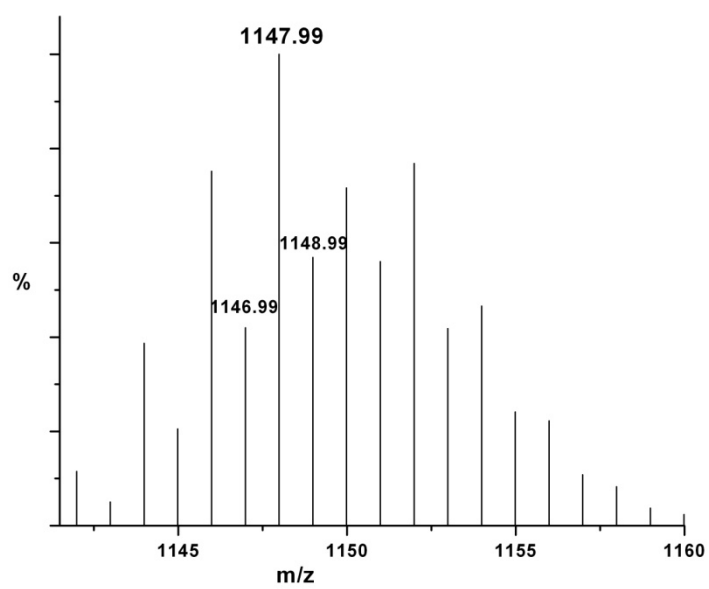

**Figure S6.** Simulated ESI-MS of **4**.

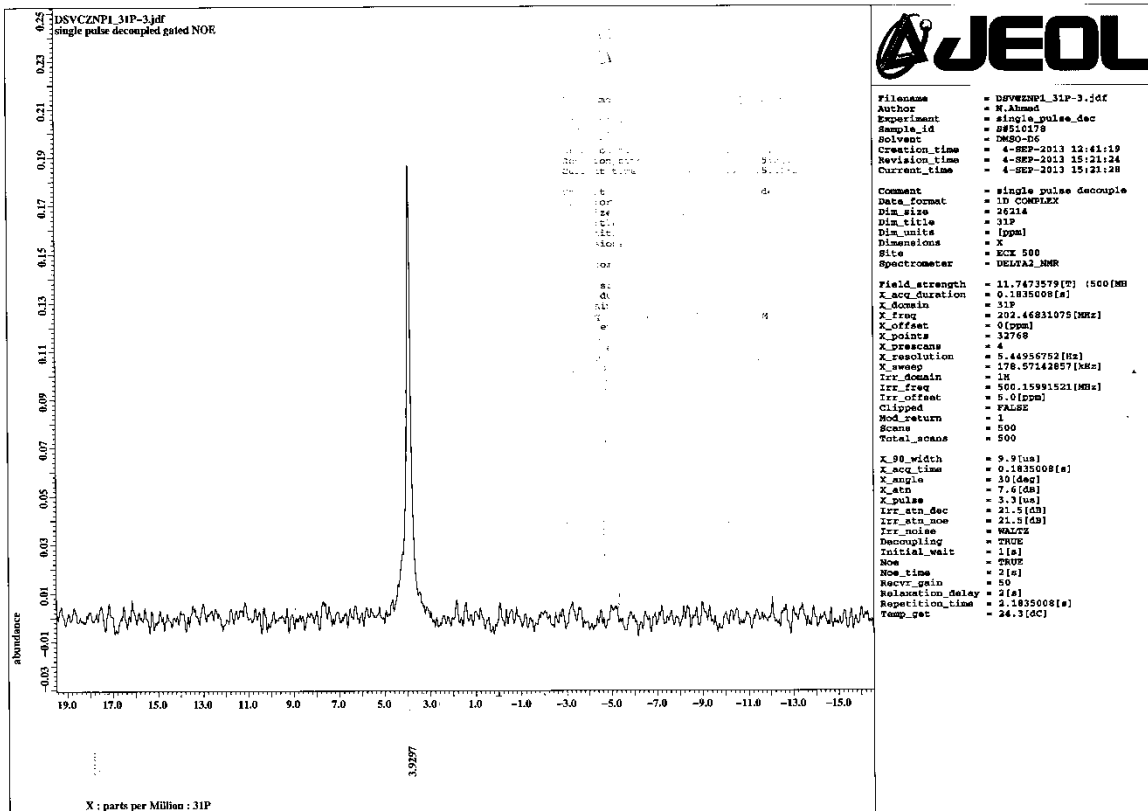

Figure S7.  $^{31}\text{P}$  NMR of 1.

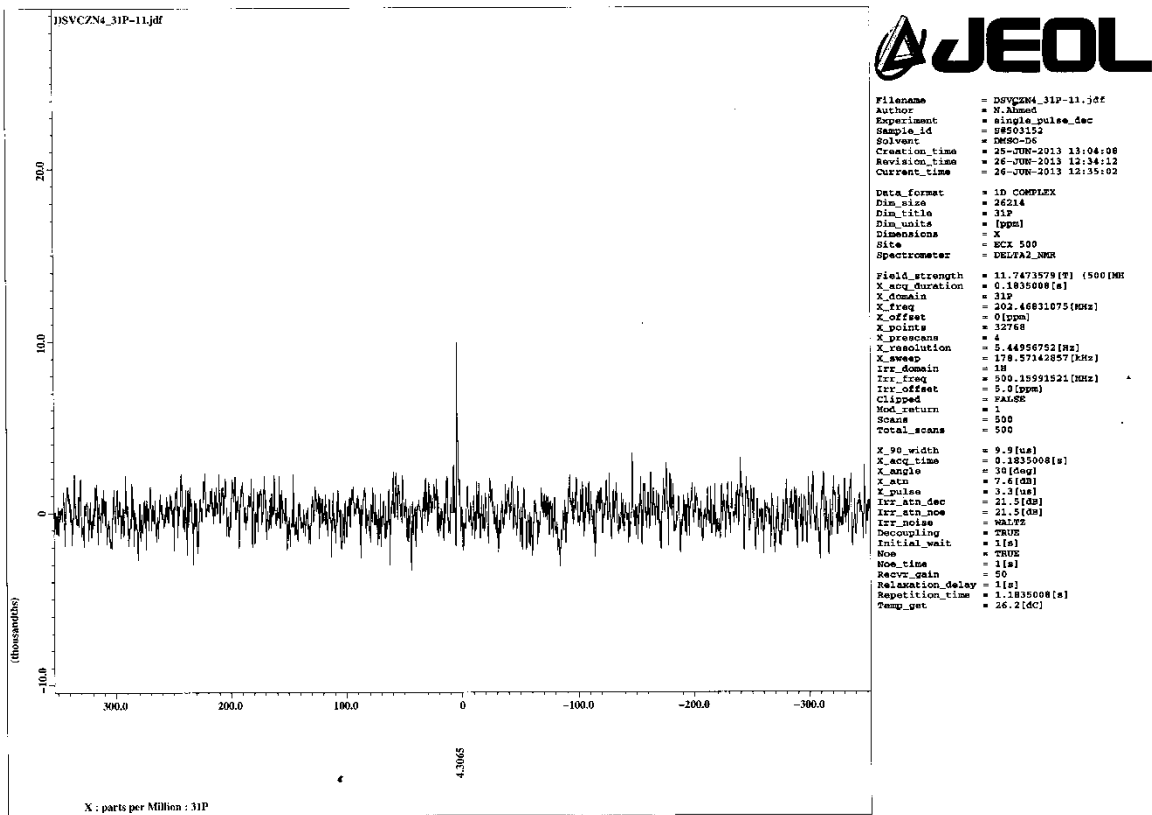

Figure S8.  $^{31}\text{P}$  NMR of 2.

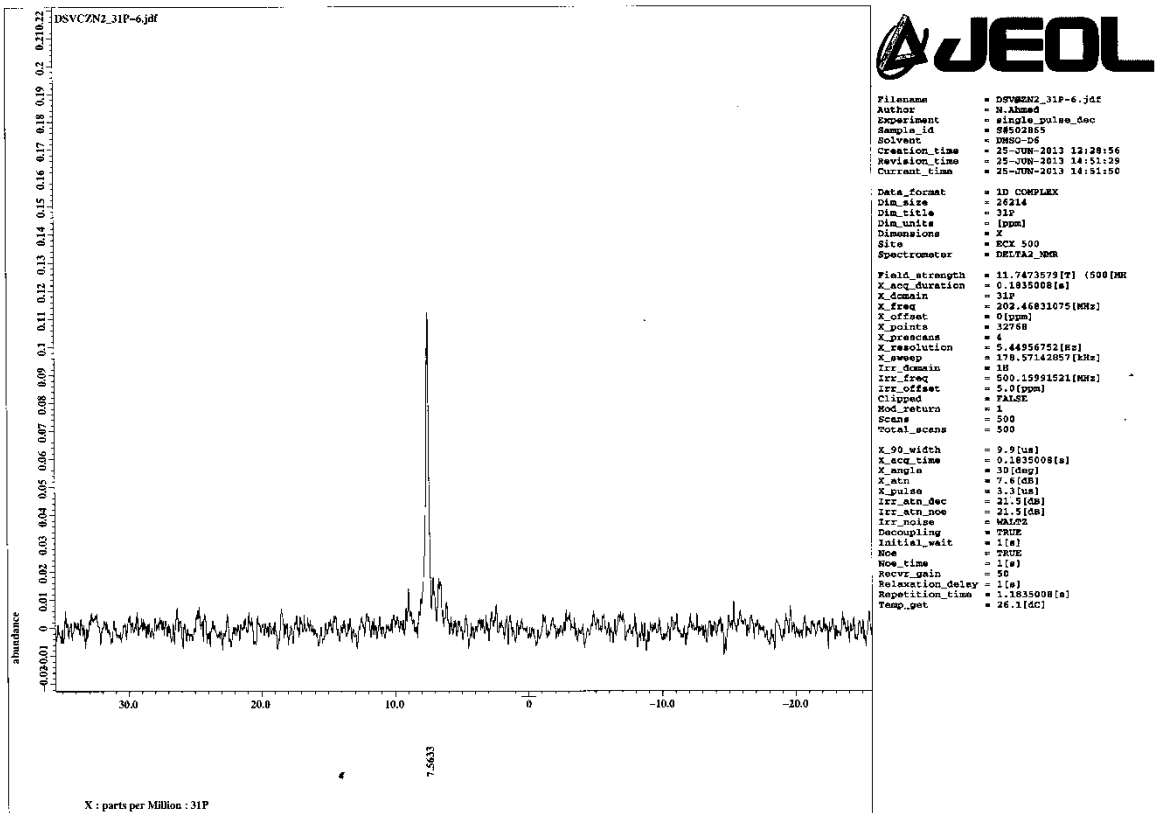

Figure S9.  $^{31}\text{P}$  NMR of 3.

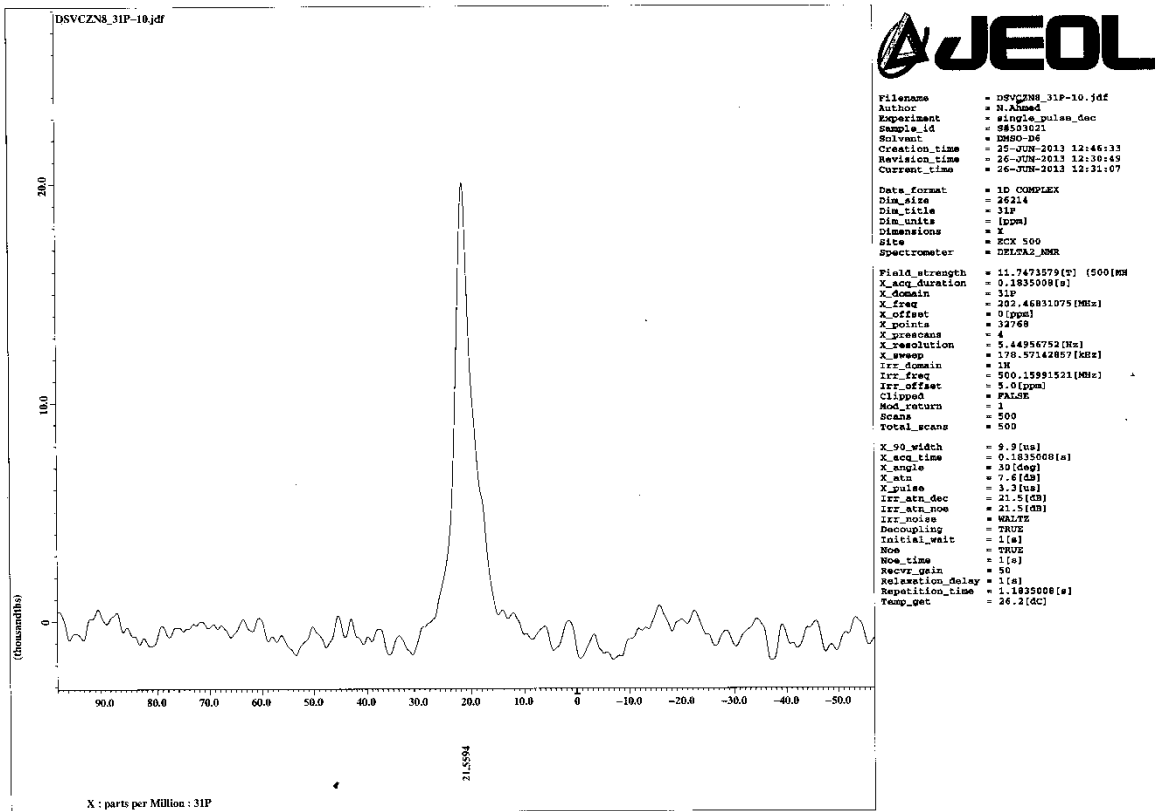

Figure S10.  $^{31}\text{P}$  NMR of 4.

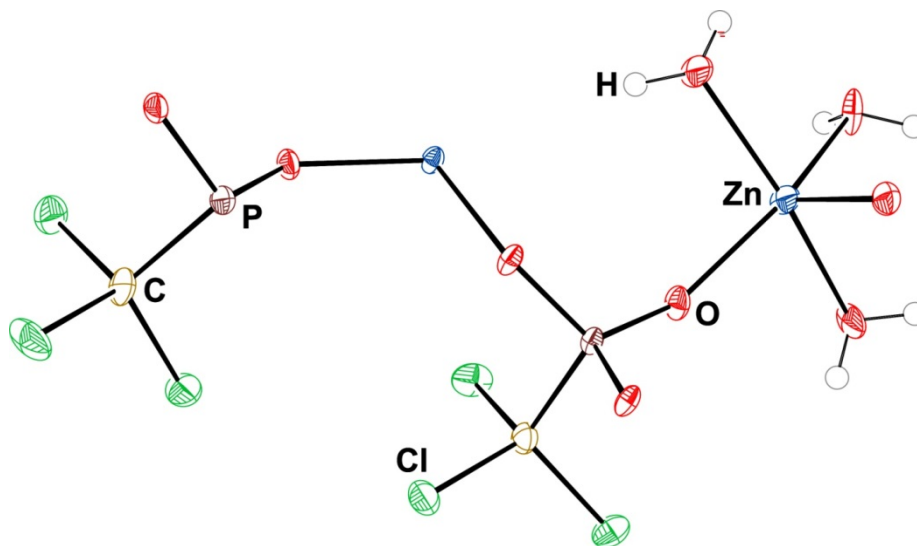

Figure S11. ORTEP diagram of 1 with 50 % thermal ellipsoids.



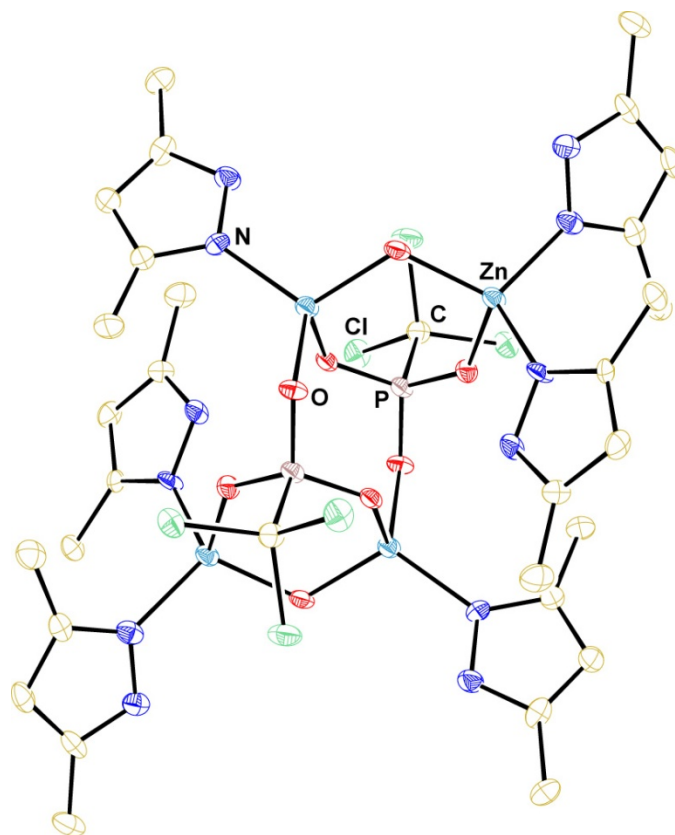

**Figure S12.** *ORTEP* diagram of **2** with 50 % thermal ellipsoids. All H atoms and two  $\text{ClO}_4^-$  anions have been deleted for clarity.

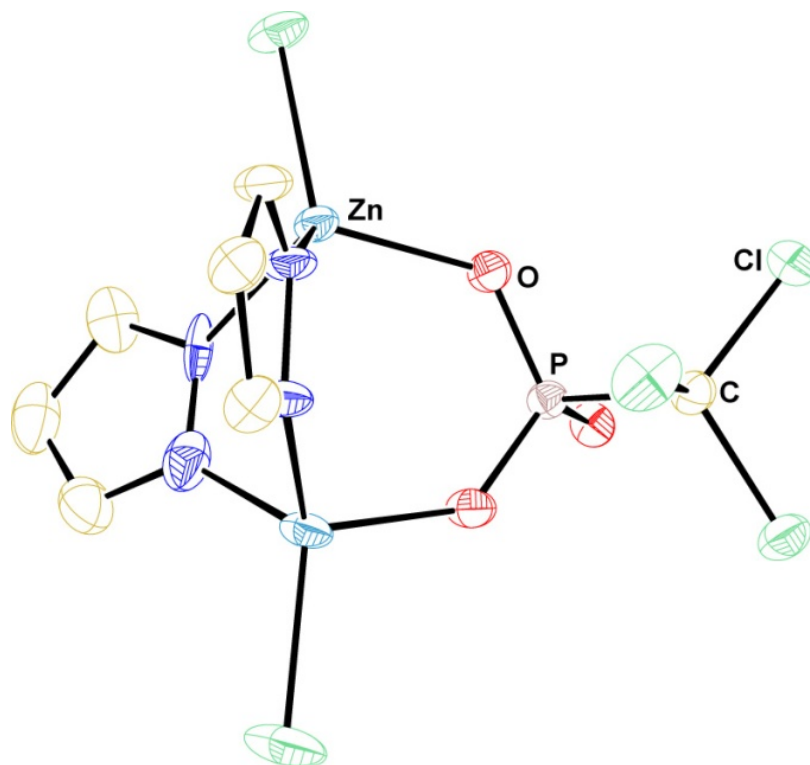

**Figure S13.** *ORTEP* diagram of **3** with 50 % thermal ellipsoids. All H atoms and two  $\text{Et}_3\text{NH}^+$  cations have been deleted for clarity.

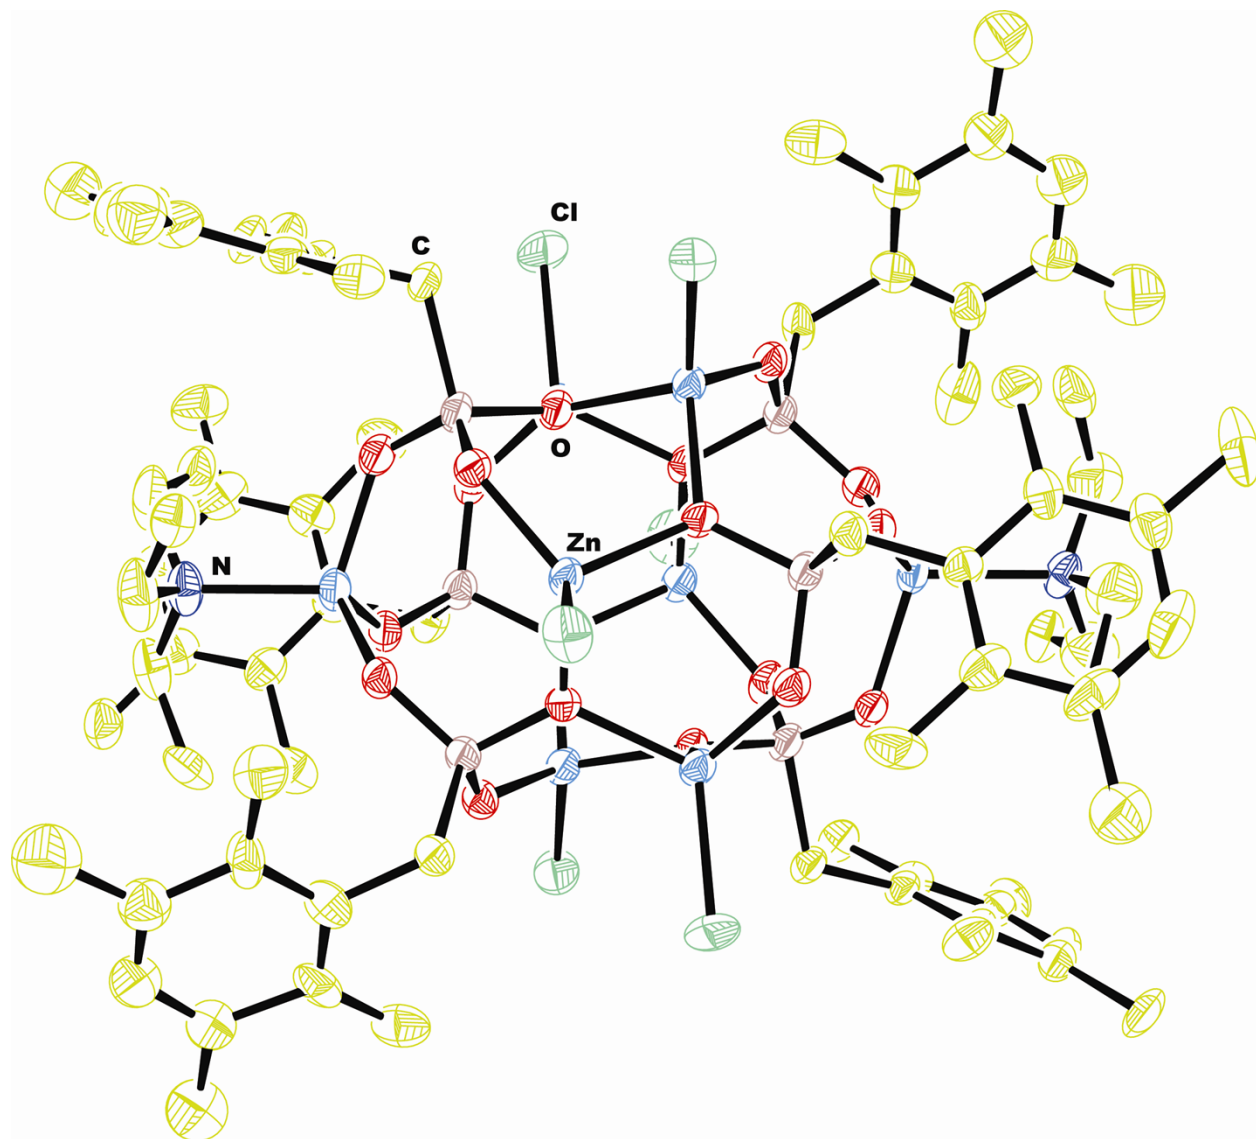

**Figure S14.** ORTEP diagram of **4** with 50% thermal ellipsoids. All H atoms , water and Et<sub>3</sub>NH<sup>+</sup> cations are not shown for clarity

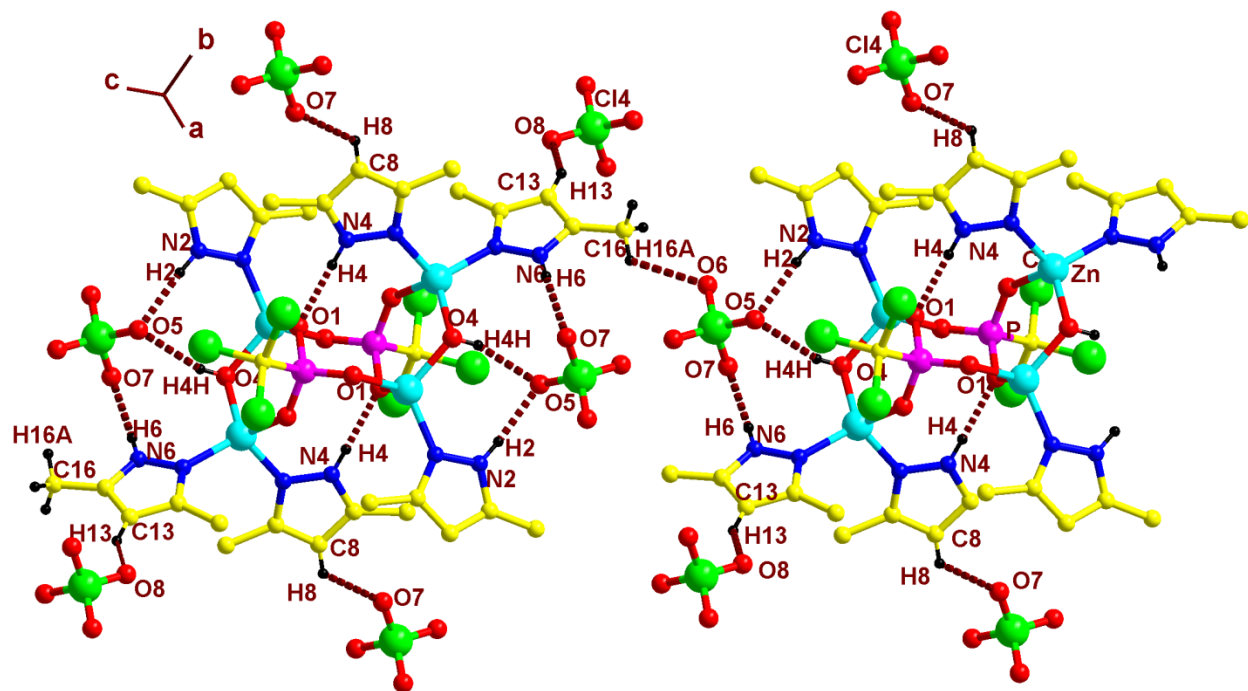

**Figure S15.** H-bond interactions in **2** (Table S1).

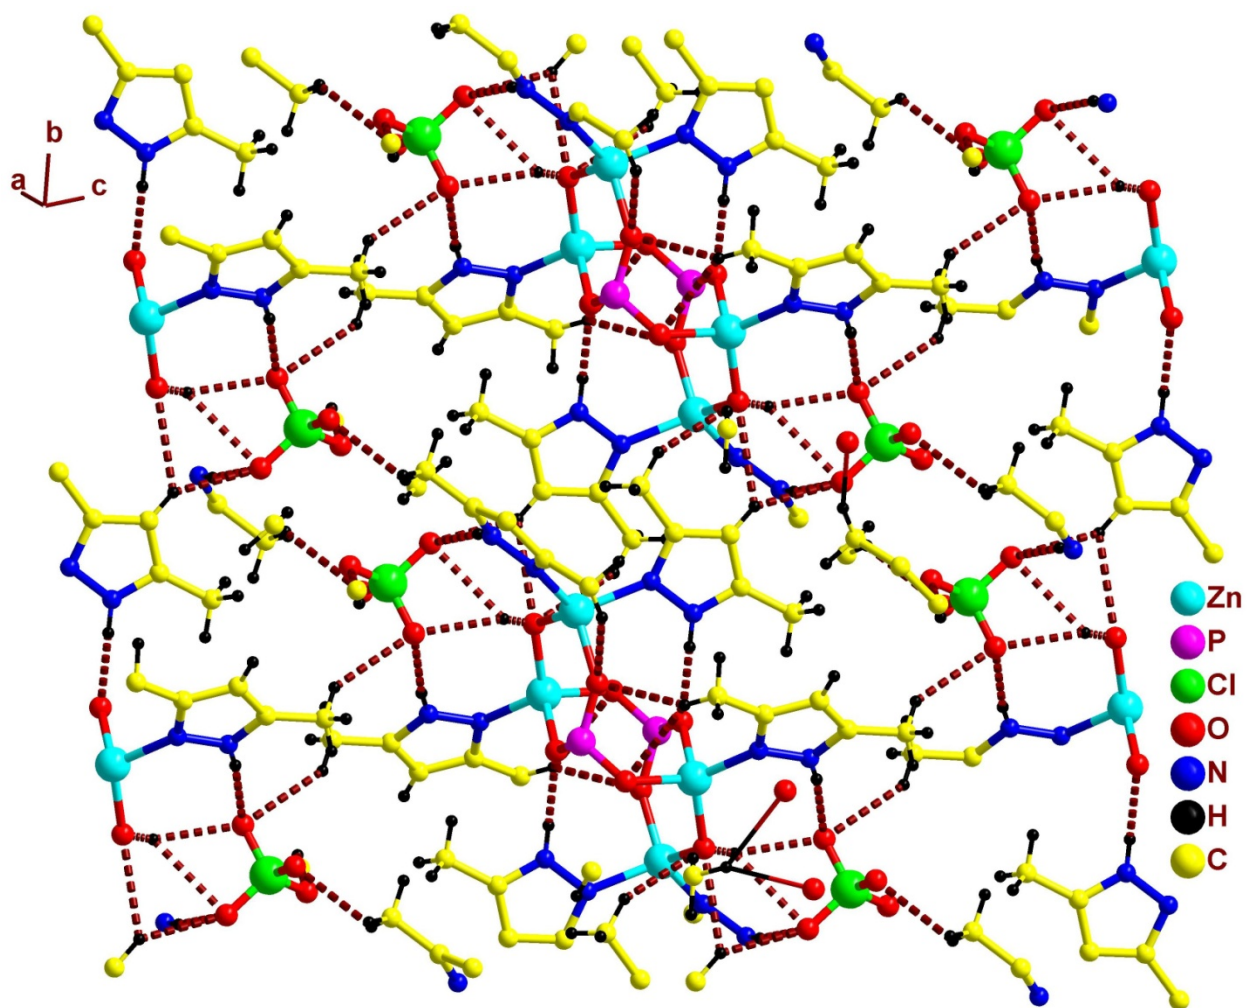

Figure S16. Supramolecular assembly along the *a*-axis of 2.

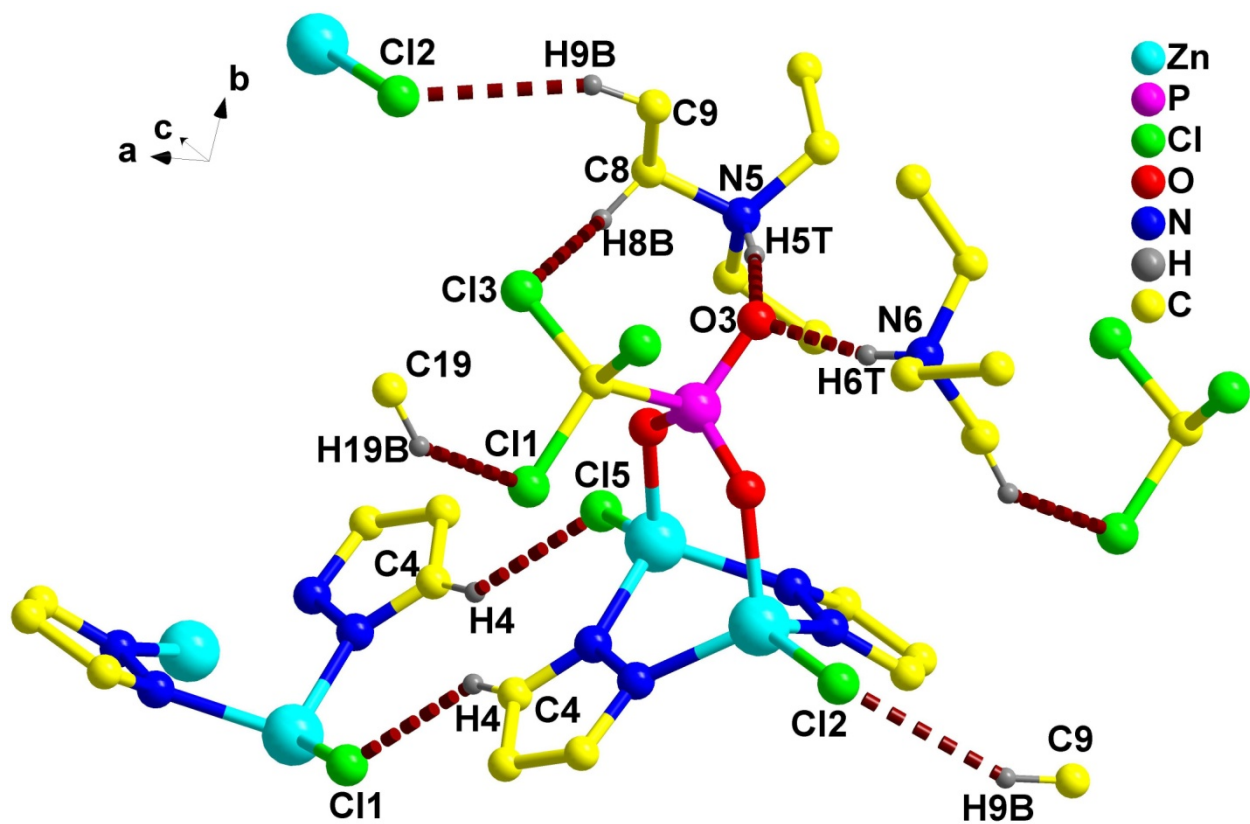

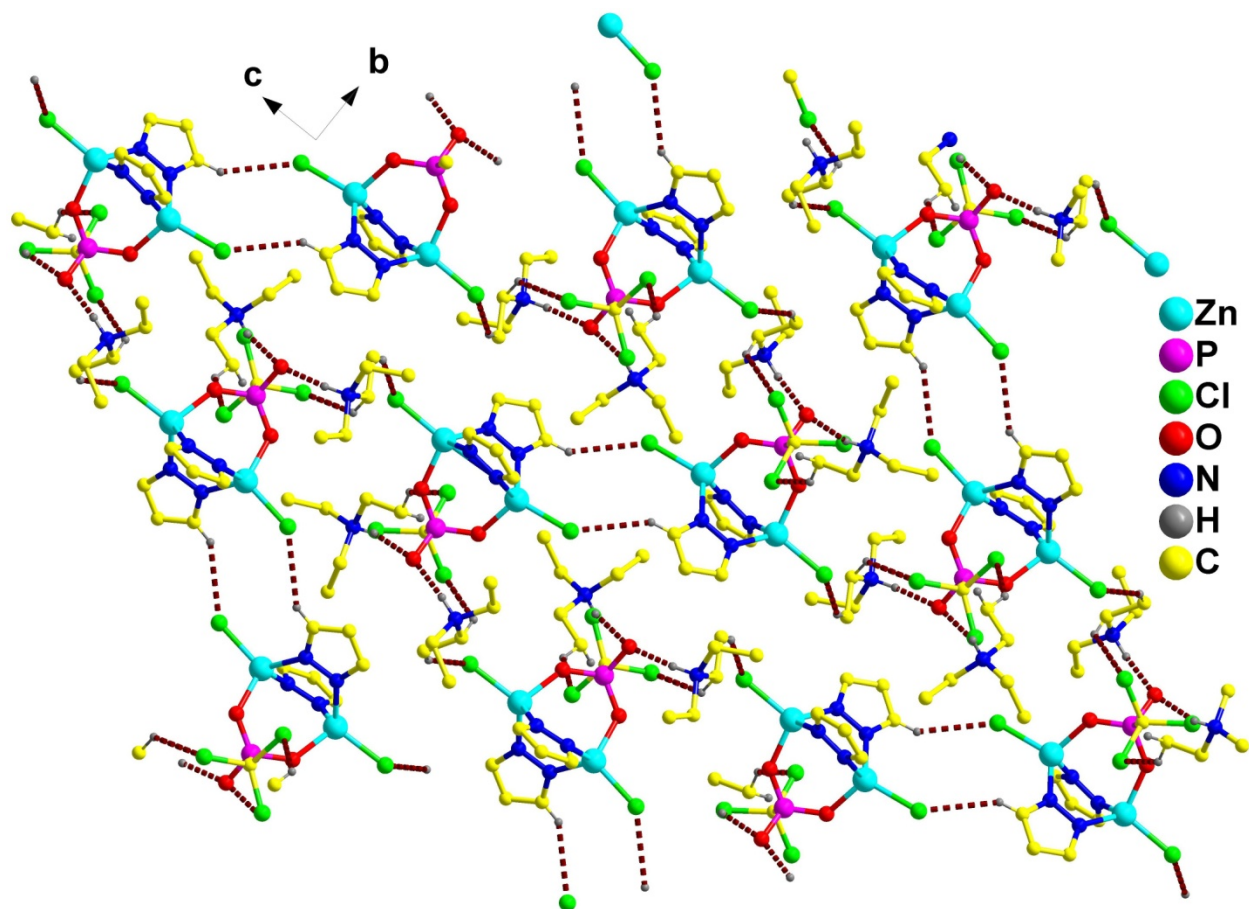

**Figure S18.** 3D-supramolecular assembly of 3 by H-bond interactions.

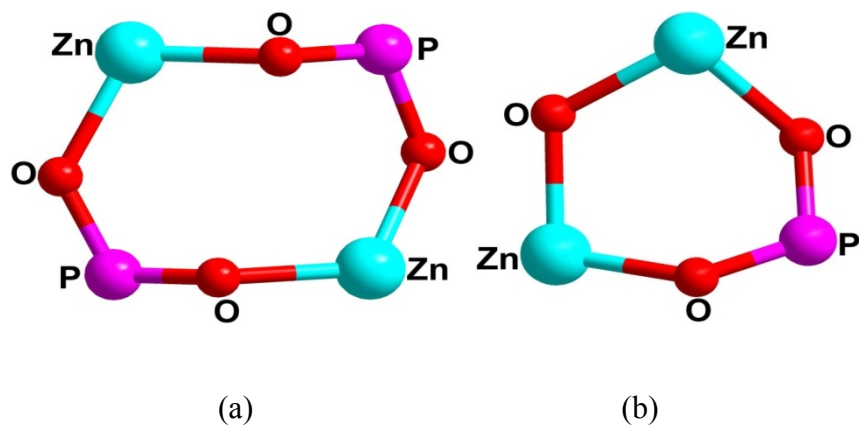

**Figure S19.** (a) Eight membered  $Zn_2P_2O_4$  ring (b) Six membered  $Zn_2O_3P$  ring of of 4.

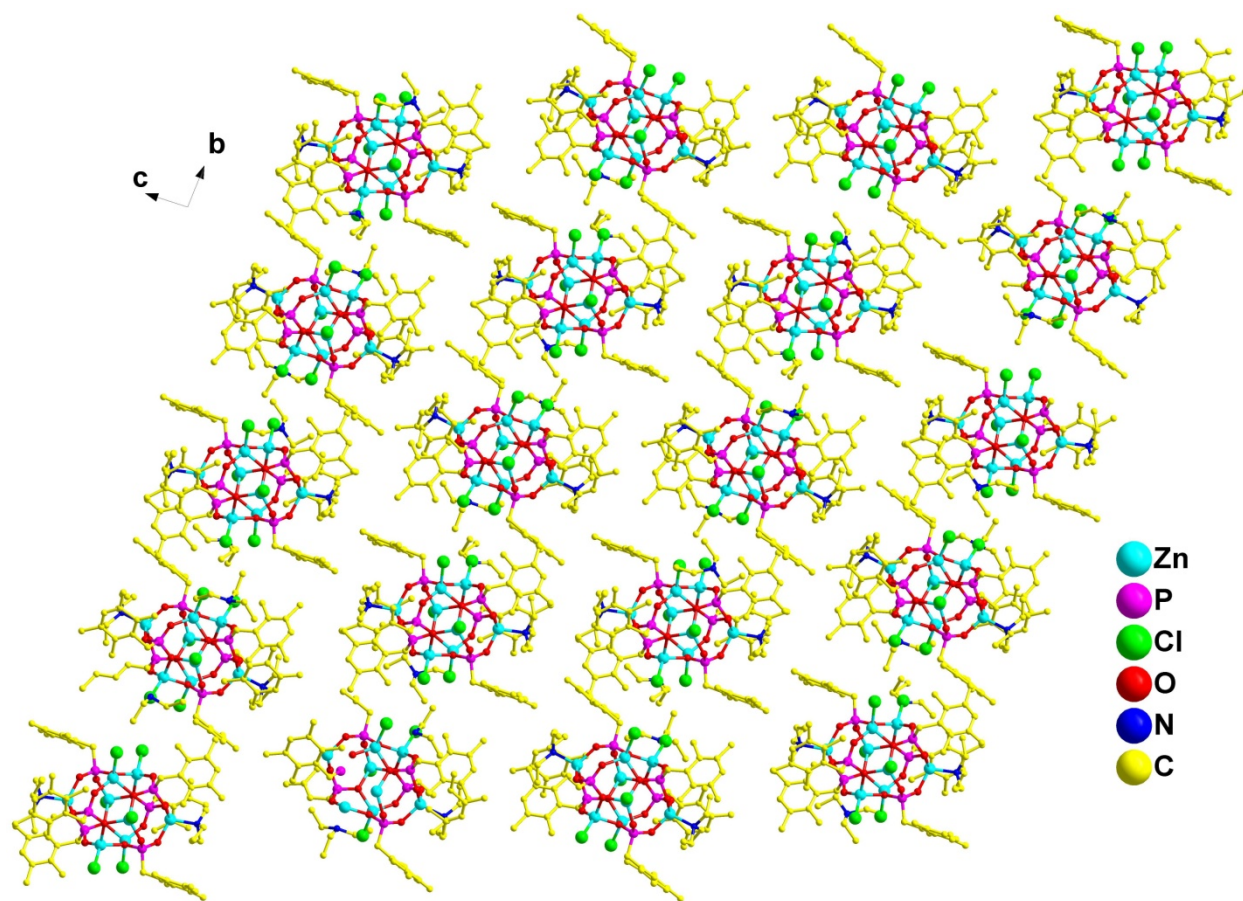

**Figure S20.** Supramolecular assembly along the *a*-axis of 4.



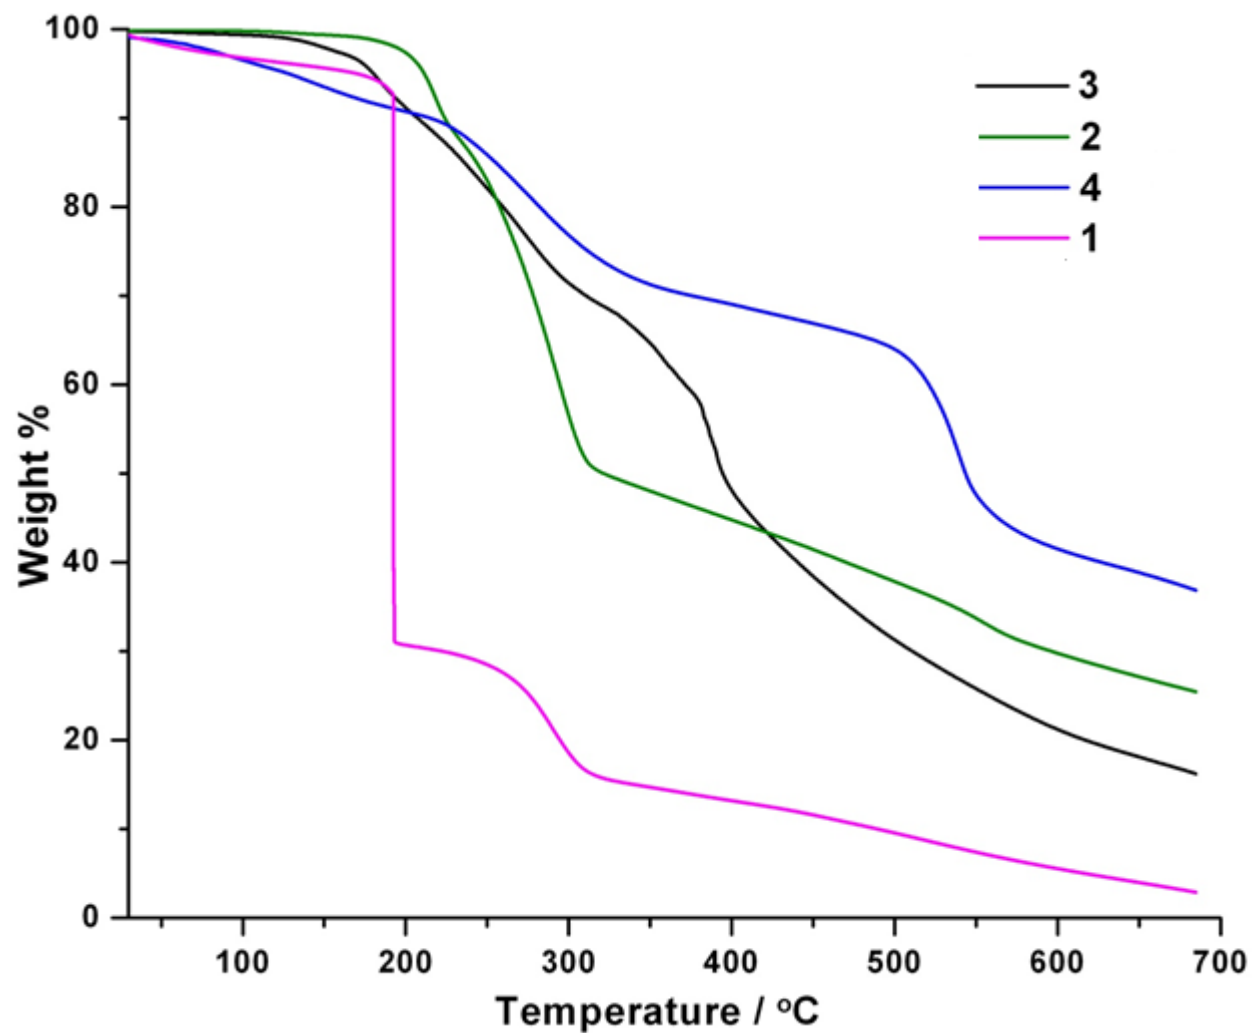

Figure S21. TGA plots of 1-4.

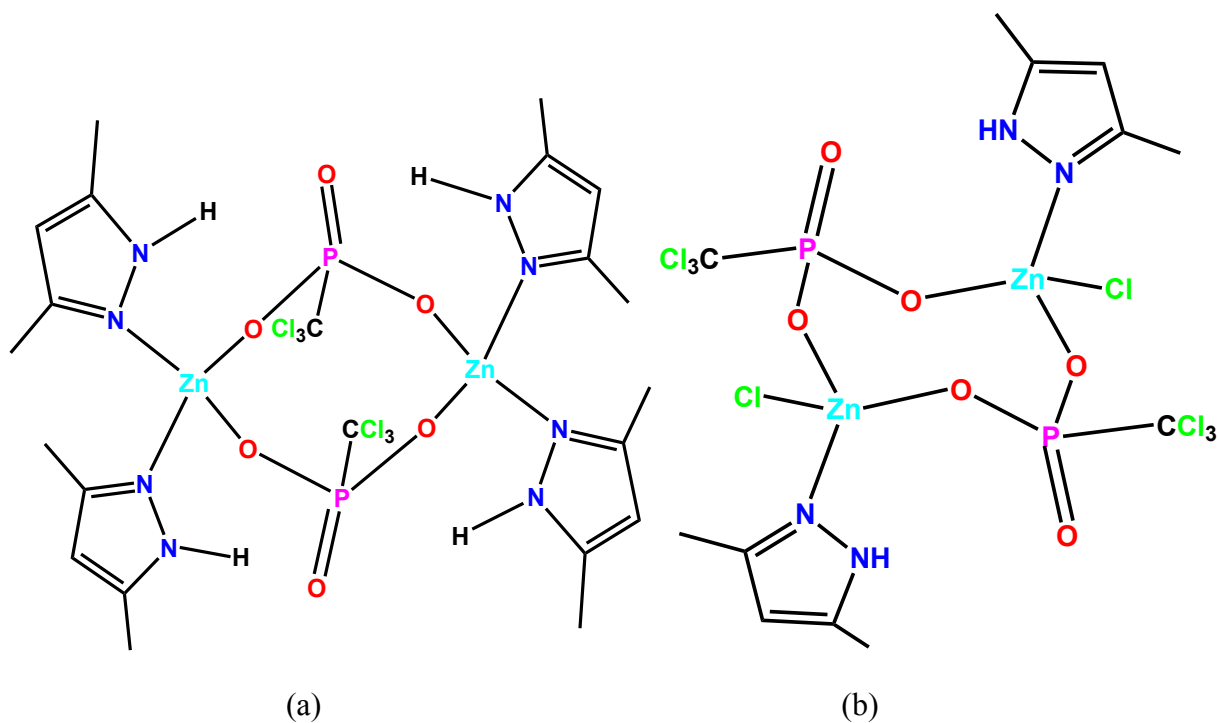

**Reference:** V. Chandrasekhar, D. Sahoo and R. K. Metre, *Cryst. Eng. Comm.* 2013, **15**, 7419.

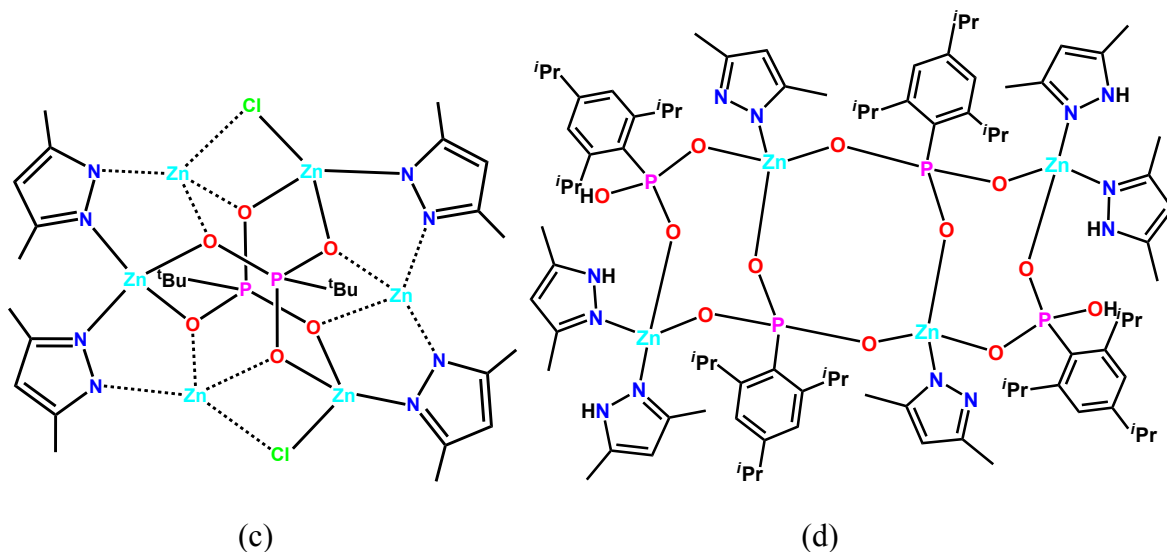

**Reference:** (c) V. Chandrasekhar, S. Kingsley, B. Rhatigan, M. K. Lam and A. L. Rheingold, *Inorg. Chem.* 2002, **41**, 1030; (d) V. Chandrasekhar, P. Sasikumar, R. Boomishankar and G. Anantharaman, *Inorg. Chem.* **2006**, **45**, 3344.

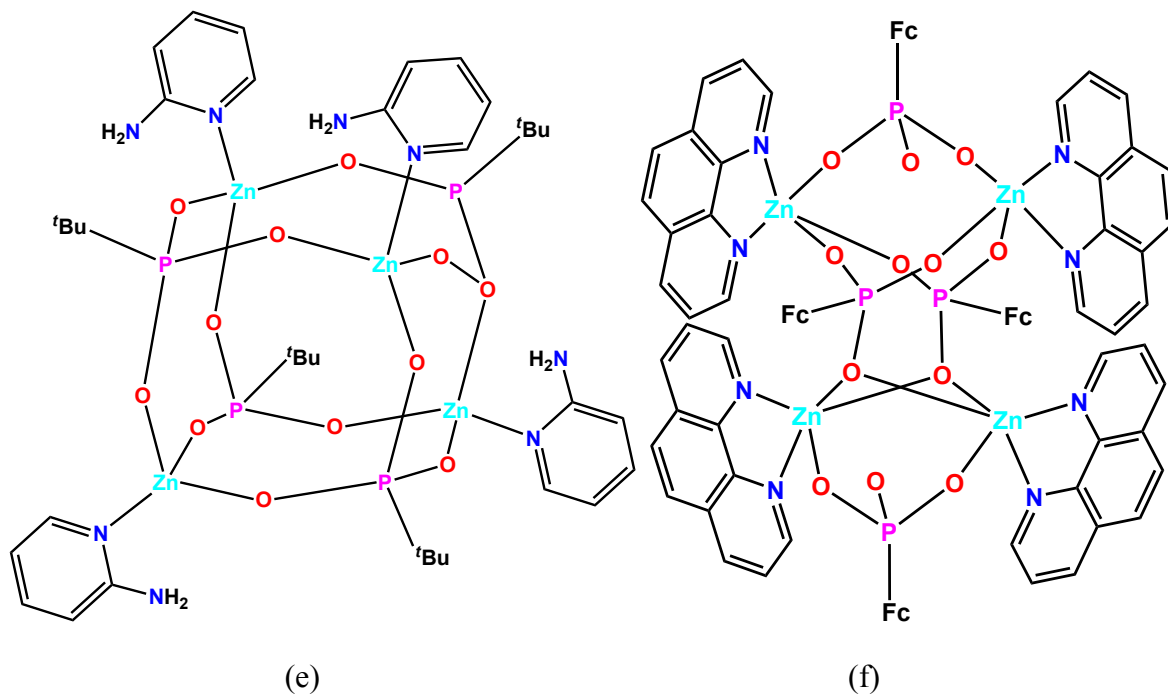

**Reference:** (e) R. Murugavel and S. Shanmugam, *Chem. Commun.* **2007**, 1257. Murugavel, R.; Shanmugam, S. *Dalton Trans.* 2008, 5358.

(f) J. Wu, Y. Song, E. Zhang, H. Hou, Y. Fan, and Y. Zhu, *Chem.-Eur. J.* 2006, **12**, 5823.

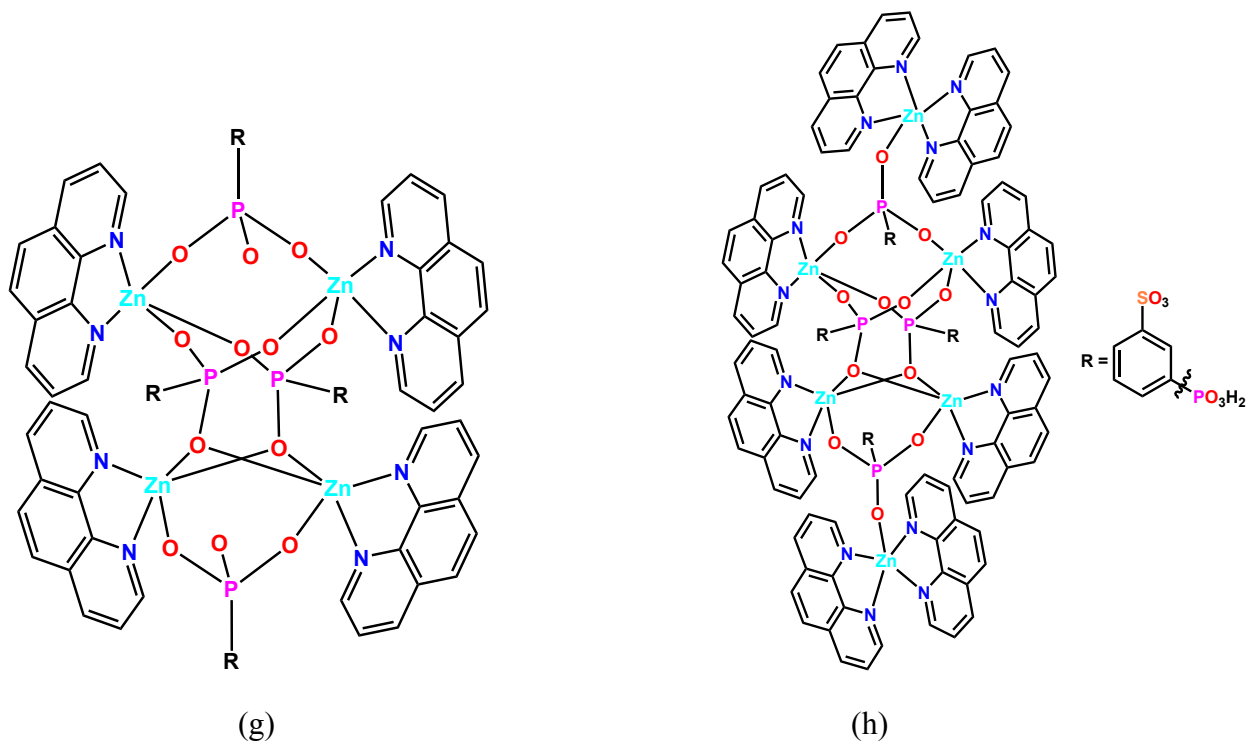

**Reference:** Z. -Y. Du, H. -B. Xu and J. -G. Mao, *Inorg. Chem.* 2006, **45**, 6424.

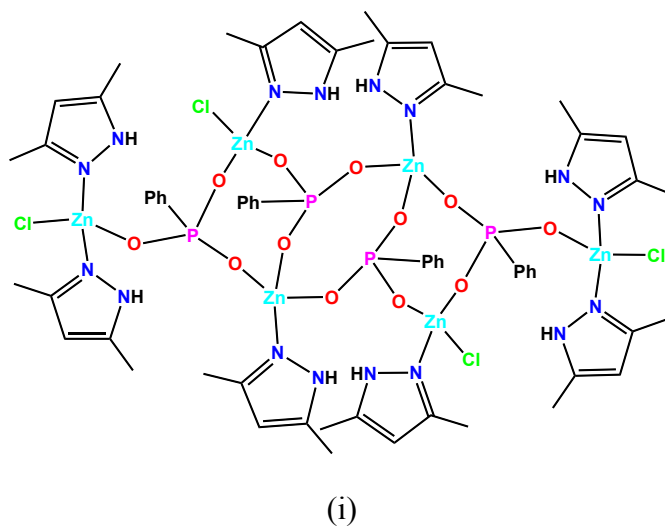

**Reference:** V. Chandrasekhar, S. Kingsley, B. Rhatigan, M. K. Lam and A. L. Rheingold, *Inorg. Chem.* 2002, **41**, 1030.

**Chart S1.** Molecular zinc(II) phosphonates known in literature (references are given below each structure)

**Table S1.** H-bond parameters of **1** (Figure 4c).

| Donor (D) | H atom | Acceptor (A) | Symmetry of A        | D...H (in Å) | H...A (in Å) | D...A (in Å) | < D-H...A (in deg) |
|-----------|--------|--------------|----------------------|--------------|--------------|--------------|--------------------|
| O1        | H1A    | O7           | 0.5-x, 0.5-y, 1-z    | 0.857(3)     | 1.909(3)     | 2.740(4)     | 162.92(24)         |
| O1        | H1B    | O8           | x, y, 1+z            | 0.858(4)     | 2.287(4)     | 3.065(6)     | 150.77(27)         |
| O3        | H3A    | O6           | 0.5-x, 0.5-y, 1-z    | 0.851(3)     | 2.055(3)     | 2.816(4)     | 148.64(20)         |
| O3        | H3B    | O5           | 0.5-x, 0.5+y, 0.5-z  | 0.851(3)     | 2.525(4)     | 3.118(5)     | 127.57(22)         |
| O3        | H3B    | O4           | 0.5-x, -0.5-y, -z    | 0.851(3)     | 2.545(4)     | 3.303(5)     | 148.94(24)         |
| O4        | H4B    | O9           | 0.5-x, -0.5+y, 0.5-z | 0.853(4)     | 2.199(3)     | 2.759(4)     | 123.05(21)         |

**Table S2.** H-bond parameters of **2** (Figure S9).

| Donor (D) | H atom | Acceptor (A) | Symmetry of A  | D...H (in Å) | H...A (in Å) | D...A (in Å) | < D-H...A (in deg) |
|-----------|--------|--------------|----------------|--------------|--------------|--------------|--------------------|
| O4        | H4H    | O5           | x, y, z        | 0.783(6)     | 2.298(6)     | 3.051(5)     | 161.78(62)         |
| N2        | H2     | O5           | x, y, z        | 0.860(5)     | 2.001(4)     | 2.850(6)     | 168.59(38)         |
| N6        | H6     | O7           | x, y, z        | 0.860(5)     | 2.068(5)     | 2.907(7)     | 164.73(38)         |
| N4        | H4     | O1           | x, y, z        | 0.860(4)     | 2.008(3)     | 2.861(5)     | 171.87(31)         |
| O4        | H4H    | O5           | x, y, z        | 0.783(6)     | 2.298(6)     | 3.051(9)     | 161.78(62)         |
| C8        | H8     | O7           | x, 1+y, z      | 0.930(6)     | 2.558(6)     | 3.257(9)     | 132.22(39)         |
| C13       | H13    | O8           | x, 1+y, -1+z   | 0.930(7)     | 2.641(6)     | 3.395(9)     | 138.73(45)         |
| C16       | H16A   | O6           | 1+x, 1+y, -1+z | 0.960(7)     | 2.662(5)     | 3.324(8)     | 126.48(45)         |

**Table S3.** H-bond parameters of **3** (Figure S11).

| Donor (D) | H atom | Acceptor (A) | Symmetry of A       | D...H (in Å) | H...A (in Å) | D...A (in Å) | < D-H...A (in deg) |
|-----------|--------|--------------|---------------------|--------------|--------------|--------------|--------------------|
| N5        | H5T    | O3           | 1-x, 1-y, -z        | 0.909(8)     | 1.829(8)     | 2.721(6)     | 166.36(73)         |
| N6        | H6T    | O3           | 1-x, 1-y, -z        | 0.909(8)     | 1.889(8)     | 2.776(7)     | 164.58(72)         |
| C8        | H8B    | Cl3          | 1-x, 1-y, -z        | 0.971(6)     | 2.842(2)     | 3.555(7)     | 130.98(72)         |
| C9        | H9B    | Cl2          | 1.5-x, 0.5+y, 0.5-z | 0.960(8)     | 2.739(2)     | 3.621(8)     | 153.23(48)         |
| C4        | H4     | Cl5          | 1-x, 1-y, -z        | 0.931(6)     | 2.892(2)     | 3.710(6)     | 147.39(39)         |
| C19       | H19B   | Cl1          | 1+x, y, z           | 0.960(8)     | 2.889(2)     | 3.615(8)     | 133.16(47)         |
| C4        | H4     | Cl1          | 1+x, y, z           | 0.931(6)     | 2.892(2)     | 3.710(6)     | 147.39(39)         |

**Table S4.** Coordination geometries, bond distances (Å) and bond angles (°) of **1**.

|                                                                                                                                              | Bond Angle (in Å)        |          | Bond distance (in °)                         |          |
|----------------------------------------------------------------------------------------------------------------------------------------------|--------------------------|----------|----------------------------------------------|----------|
| 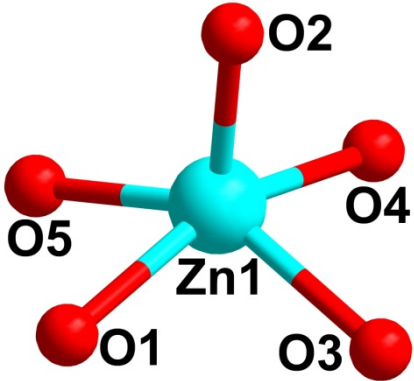 <p style="text-align: center;"><b>Square Pyramidal</b></p> | Zn(1)-O(2)               | 1.965(8) | O(2)-Zn(1)-O(5)                              | 110.0(3) |
|                                                                                                                                              | Zn(1)-O(5)               | 1.972(8) | O(2)-Zn(1)-O(3)                              | 103.3(3) |
|                                                                                                                                              | Zn(1)-O(3)               | 2.048(8) | O(5)-Zn(1)-O(3)                              | 145.0(3) |
|                                                                                                                                              | Zn(1)-O(4)               | 2.050(8) | O(2)-Zn(1)-O(4)                              | 102.5(4) |
|                                                                                                                                              | Zn(1)-O(1)               | 2.131(9) | O(5)-Zn(1)-O(4)                              | 97.9(3)  |
|                                                                                                                                              |                          |          | O(3)-Zn(1)-O(4)                              | 84.8(3)  |
|                                                                                                                                              |                          |          | O(2)-Zn(1)-O(1)                              | 96.0(3)  |
|                                                                                                                                              |                          |          | O(5)-Zn(1)-O(1)                              | 81.9(3)  |
|                                                                                                                                              |                          |          | O(3)-Zn(1)-O(1)                              | 84.3(3)  |
|                                                                                                                                              |                          |          | O(4)-Zn(1)-O(1)                              | 160.3(4) |
|  <p style="text-align: center;"><b>Tetrahedral</b></p>    | Zn(2)-O(8)               | 1.942(8) | O(8)-Zn(2)-O(7)                              | 109.2(3) |
|                                                                                                                                              | Zn(2)-O(7)               | 1.936(7) | O(8)-Zn(2)-O(6) <sup>#1</sup>                | 119.8(3) |
|                                                                                                                                              | Zn(2)-O(6) <sup>#1</sup> | 1.949(7) | O(7)-Zn(2)-O(6) <sup>#1</sup>                | 119.3(3) |
|                                                                                                                                              | Zn(2)-O(9) <sup>#2</sup> | 1.987(8) | O(8)-Zn(2)-O(9) <sup>#2</sup>                | 108.7(3) |
|                                                                                                                                              |                          |          | O(7)-Zn(2)-O(9) <sup>#2</sup>                | 96.9(3)  |
|                                                                                                                                              |                          |          | O(6) <sup>#1</sup> -Zn(2)-O(9) <sup>#2</sup> | 99.0(3)  |
|                                                                                                                                              |                          |          |                                              |          |

**Table S5.** Coordination geometries, bond distances (Å) and bond angles (°) of **2**.

|                                                                                                                                          | Bond Distances (Å) |          | Bond Angles (°)   |          |
|------------------------------------------------------------------------------------------------------------------------------------------|--------------------|----------|-------------------|----------|
| 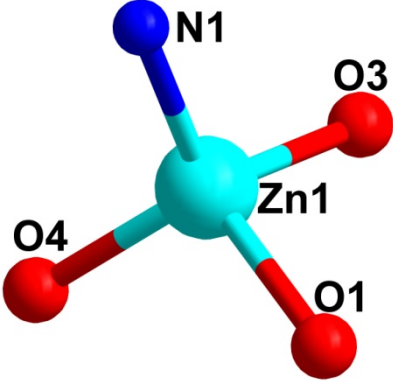 <p style="text-align: center;"><b>Tetrahedral</b></p>  | Zn(1)-O(4)         | 1.927(6) | O(4)-Zn(1)-O(3)#1 | 106.6(3) |
|                                                                                                                                          | Zn(1)-O(3)#1       | 1.952(6) | O(4)-Zn(1)-N(1)   | 115.1(3) |
|                                                                                                                                          | Zn(1)-N(1)         | 1.981(7) | O(3)#1-Zn(1)-N(1) | 117.5(3) |
|                                                                                                                                          | Zn(1)-O(1)         | 2.003(6) | O(4)-Zn(1)-O(1)   | 110.2(3) |
|                                                                                                                                          |                    |          | O(3)#1-Zn(1)-O(1) | 103.6(2) |
|                                                                                                                                          |                    |          | N(1)-Zn(1)-O(1)   | 103.2(3) |
|                                                                                                                                          |                    |          |                   |          |
|  <p style="text-align: center;"><b>Tetrahedral</b></p> | Zn(2)-O(2)         | 1.937(6) | O(2)-Zn(2)-O(4)   | 104.3(3) |
|                                                                                                                                          | Zn(2)-O(4)         | 1.938(7) | O(2)-Zn(2)-N(3)   | 97.7(3)  |
|                                                                                                                                          | Zn(2)-N(3)         | 1.997(8) | O(4)-Zn(2)-N(3)   | 117.0(3) |
|                                                                                                                                          | Zn(2)-N(5)         | 1.998(7) | O(2)-Zn(2)-N(5)   | 114.1(3) |
|                                                                                                                                          |                    |          | O(4)-Zn(2)-N(5)   | 111.6(3) |
|                                                                                                                                          |                    |          | N(3)-Zn(2)-N(5)   | 111.3(3) |
|                                                                                                                                          |                    |          |                   |          |

**Table S6.** Coordination geometries, bond distances (Å) and bond angles (°) of **3**.

|                                                                                                              | Bond Distances (Å) |                  | Bond Angles (°)  |            |
|--------------------------------------------------------------------------------------------------------------|--------------------|------------------|------------------|------------|
| 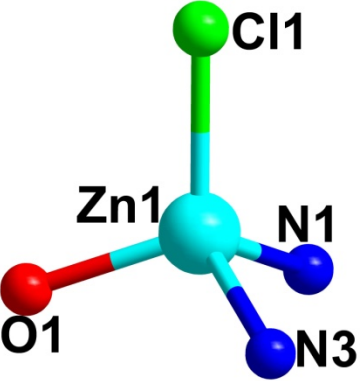 <p><b>Tetrahedral</b></p>  | Zn(1)-O(1)         | 1.961(4)         | O(1)-Zn(1)-N(3)  | 106.19(17) |
|                                                                                                              | Zn(1)-N(3)         | 1.995(5)         | O(1)-Zn(1)-N(1)  | 108.90(17) |
|                                                                                                              | Zn(1)-N(1)         | 2.042(5)         | N(3)-Zn(1)-N(1)  | 101.97(19) |
|                                                                                                              | Zn(1)-Cl(1)        | 2.2137(2)        | O(1)-Zn(1)-Cl(1) | 110.07(12) |
|                                                                                                              |                    |                  | N(3)-Zn(1)-Cl(1) | 117.97(13) |
|                                                                                                              |                    | N(1)-Zn(1)-Cl(1) | 111.17(16)       |            |
|  <p><b>Tetrahedral</b></p> | Zn(2)-O(2)         | 1.954(4)         | O(2)-Zn(2)-N(4)  | 110.63(17) |
|                                                                                                              | Zn(2)-N(4)         | 1.996(5)         | O(2)-Zn(2)-N(2)  | 102.98(19) |
|                                                                                                              | Zn(2)-N(2)         | 2.004(6)         | N(4)-Zn(2)-N(2)  | 100.4(2)   |
|                                                                                                              | Zn(2)-Cl(2)        | 2.2164(2)        | O(2)-Zn(2)-Cl(2) | 105.69(12) |
|                                                                                                              |                    |                  | N(4)-Zn(2)-Cl(2) | 121.05(14) |
|                                                                                                              |                    | N(2)-Zn(2)-Cl(2) | 114.79(17)       |            |



**Table S7.** Coordination geometries, bond distances (Å) and bond angles (°) of **4**.

|                                                                                                     | Bond Distances (Å) |          | Bond Angles (°)   |          |
|-----------------------------------------------------------------------------------------------------|--------------------|----------|-------------------|----------|
| <p style="text-align: center;"><b>Zn1</b></p> <p style="text-align: center;"><b>Tetrahedral</b></p> | Zn(1)-O(7)         | 1.928(8) | O(7)-Zn(1)-O(4)   | 110.5(4) |
|                                                                                                     | Zn(1)-O(4)         | 1.923(8) | O(7)-Zn(1)-O(1)   | 112.5(3) |
|                                                                                                     | Zn(1)-O(1)         | 1.933(8) | O(4)-Zn(1)-O(1)   | 112.6(3) |
|                                                                                                     | Zn(1)-N(1)         | 2.011(1) | O(7)-Zn(1)-N(1)   | 109.8(4) |
|                                                                                                     |                    |          | O(4)-Zn(1)-N(1)   | 106.6(4) |
|                                                                                                     |                    |          | O(1)-Zn(1)-N(1)   | 104.4(4) |
| <p style="text-align: center;"><b>Zn2</b></p> <p style="text-align: center;"><b>Tetrahedral</b></p> | Zn(2)-O(5)         | 1.894(8) | O(5)-Zn(2)-O(2)   | 118.5(3) |
|                                                                                                     | Zn(2)-O(2)         | 1.994(9) | O(5)-Zn(2)-O(10)  | 100.9(3) |
|                                                                                                     | Zn(2)-O(10)        | 2.019(7) | O(2)-Zn(2)-O(10)  | 97.6(4)  |
|                                                                                                     | Zn(2)-Cl(1)        | 2.203(4) | O(5)-Zn(2)-Cl(1)  | 112.5(3) |
|                                                                                                     |                    |          | O(2)-Zn(2)-Cl(1)  | 108.6(3) |
|                                                                                                     |                    |          | O(10)-Zn(2)-Cl(1) | 118.2(2) |
| <p style="text-align: center;"><b>Zn3</b></p> <p style="text-align: center;"><b>Tetrahedral</b></p> | Zn(3)-O(3)         | 1.943(8) | O(3)-Zn(3)-O(8)   | 119.7(4) |
|                                                                                                     | Zn(3)-O(8)         | 2.005(7) | O(3)-Zn(3)-O(13)  | 100.0(3) |
|                                                                                                     | Zn(3)-O(13)        | 2.013(7) | O(8)-Zn(3)-O(13)  | 96.5(3)  |
|                                                                                                     | Zn(3)-Cl(2)        | 2.206(4) | O(3)-Zn(3)-Cl(2)  | 112.7(3) |
|                                                                                                     |                    |          | O(8)-Zn(3)-Cl(2)  | 110.2(3) |
|                                                                                                     |                    |          | O(13)-Zn(3)-Cl(2) | 116.6(3) |

|                                                                                                                                           |                                                                                                          |                                                                                                                                                                                               |
|-------------------------------------------------------------------------------------------------------------------------------------------|----------------------------------------------------------------------------------------------------------|-----------------------------------------------------------------------------------------------------------------------------------------------------------------------------------------------|
| <p style="text-align: center;"><b>Tetrahedral</b></p>                                                                                     |                                                                                                          |                                                                                                                                                                                               |
| 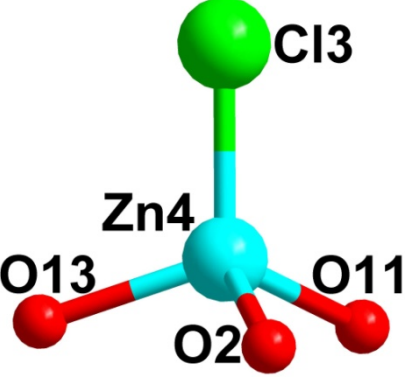 <p style="text-align: center;"><b>Tetrahedral</b></p>   | <p>Zn(4)-O(11) 1.921(8)<br/> Zn(4)-O(13) 2.007(8)<br/> Zn(4)-O(2) 2.018(8)<br/> Zn(4)-Cl(3) 2.200(4)</p> | <p>O(11)-Zn(4)-O(13) 121.0(3)<br/> O(11)-Zn(4)-O(2) 100.7(4)<br/> O(13)-Zn(4)-O(2) 98.6(3)<br/> O(11)-Zn(4)-Cl(3) 111.6(3)<br/> O(13)-Zn(4)-Cl(3) 107.8(3)<br/> O(2)-Zn(4)-Cl(3) 116.8(2)</p> |
|  <p style="text-align: center;"><b>Tetrahedral</b></p>  | <p>Zn(5)-O(9) 1.903(8)<br/> Zn(5)-O(6) 1.979(8)<br/> Zn(5)-O(16) 1.980(8)<br/> Zn(5)-Cl(4) 2.202(4)</p>  | <p>O(9)-Zn(5)-O(6) 118.9(3)<br/> O(9)-Zn(5)-O(16) 100.8(3)<br/> O(6)-Zn(5)-O(16) 99.0(3)<br/> O(9)-Zn(5)-Cl(4) 113.1(3)<br/> O(6)-Zn(5)-Cl(4) 108.0(3)<br/> O(16)-Zn(5)-Cl(4) 116.5(3)</p>    |
|  <p style="text-align: center;"><b>Tetrahedral</b></p> | <p>Zn(6)-O(17) 1.925(8)<br/> Zn(6)-O(10) 1.990(8)<br/> Zn(6)-O(6) 2.040(7)<br/> Zn(6)-Cl(5) 2.220(4)</p> | <p>O(17)-Zn(6)-O(10) 121.8(4)<br/> O(17)-Zn(6)-O(6) 99.6(3)<br/> O(10)-Zn(6)-O(6) 96.5(3)<br/> O(17)-Zn(6)-Cl(5) 112.6(3)<br/> O(10)-Zn(6)-Cl(5) 107.2(3)<br/> O(6)-Zn(6)-Cl(5) 118.7(3)</p>  |

| Tetrahedral                                                                                                                         |                                                                                                                                                                                                                                   |                                                                                                                                                                                                                                                                                                                                                                                                     |
|-------------------------------------------------------------------------------------------------------------------------------------|-----------------------------------------------------------------------------------------------------------------------------------------------------------------------------------------------------------------------------------|-----------------------------------------------------------------------------------------------------------------------------------------------------------------------------------------------------------------------------------------------------------------------------------------------------------------------------------------------------------------------------------------------------|
| 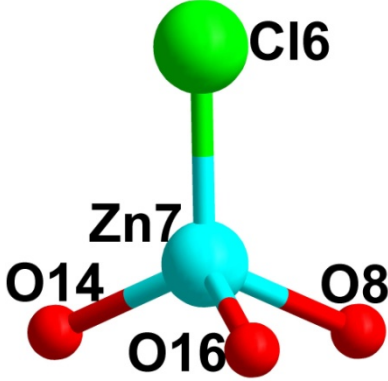 <p data-bbox="337 737 506 768">Tetrahedral</p>    | <p data-bbox="669 296 927 327">Zn(7)-O(14) 1.918(8)</p> <p data-bbox="669 363 927 394">Zn(7)-O(16) 2.007(9)</p> <p data-bbox="669 430 914 462">Zn(7)-O(8) 2.006(8)</p> <p data-bbox="669 497 919 529">Zn(7)-Cl(6) 2.216(4)</p>    | <p data-bbox="1008 296 1401 327">O(14)-Zn(7)-O(16) 118.8(3)</p> <p data-bbox="1008 363 1401 394">O(14)-Zn(7)-O(8) 101.5(3)</p> <p data-bbox="1008 430 1388 462">O(16)-Zn(7)-O(8) 99.2(3)</p> <p data-bbox="1008 497 1401 529">O(14)-Zn(7)-Cl(6) 114.0(3)</p> <p data-bbox="1008 564 1401 596">O(16)-Zn(7)-Cl(6) 107.6(2)</p> <p data-bbox="1008 632 1401 663">O(8)-Zn(7)-Cl(6) 115.0(2)</p>         |
|  <p data-bbox="337 1283 506 1314">Tetrahedral</p> | <p data-bbox="669 842 964 873">Zn(8)-O(15) 1.916(8)</p> <p data-bbox="669 909 964 940">Zn(8)-O(18) 1.925(7)</p> <p data-bbox="669 976 964 1008">Zn(8)-O(12) 1.940(9)</p> <p data-bbox="669 1043 964 1075">Zn(8)-N(2) 2.041(9)</p> | <p data-bbox="1008 842 1401 873">O(15)-Zn(8)-O(18) 109.7(3)</p> <p data-bbox="1008 909 1401 940">O(15)-Zn(8)-O(12) 110.6(3)</p> <p data-bbox="1008 976 1401 1008">O(18)-Zn(8)-O(12) 112.8(4)</p> <p data-bbox="1008 1043 1401 1075">O(15)-Zn(8)-N(2) 106.1(4)</p> <p data-bbox="1008 1110 1401 1142">O(18)-Zn(8)-N(2) 107.9(4)</p> <p data-bbox="1008 1178 1401 1209">O(12)-Zn(8)-N(2) 109.5(4)</p> |
